# Supplementary material for: Glucagon receptor antagonist upregulates circulating GLP-1 level by promoting intestinal L-cell proliferation and GLP-1 production in type 2 diabetes
Source: PubMed Central journal article supplement — BMJ Open Diabetes Res Care. 2020 Mar 4;8(1):e001025. doi: 10.1136/bmjdrc-2019-001025 (PMC7059498; doi:10.1136/bmjdrc-2019-001025), 2020-03-04
Supplement: bmjdrc-2019-001025supp001.pdf [file bmjdrc-2019-001025supp001.pdf]

## Supplementary figures and tables

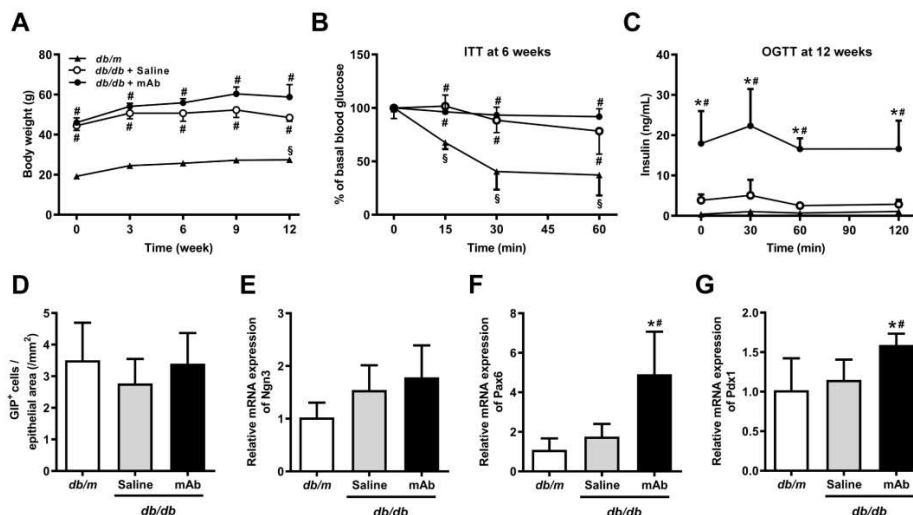

**Supplementary figure S1. Metabolic parameters and histocytological markers of *db/db* mice treated with GCGR mAb or vehicle for 12 weeks.** A GCGR mAb, REMD 2.59 (5 mg/kg), or saline was intraperitoneally administered once a week in male diabetic *db/db* mice, and age-matched male *db/m* mice were included as normal controls. (A-C) Metabolic parameters including body weight (A), blood glucose levels during ITT (B), and plasma insulin levels during OGTT (C) after the treatment.  $n=4-5$  mice per group. (D) Quantification of GIP-positive K-cells per epithelial area.  $n=3-5$  sections per mouse multiplied by 4-5 mice per group. (E-G) Relative mRNA levels of Ngn3 (E), Pax6 (F) and Pdx1 (G) in ileum tissues were detected by qRT-PCR.  $n=4-5$  mice per group. Data are shown as mean  $\pm$  SD. Statistical analysis was conducted using one-way analysis of variance followed by the post hoc Tukey-Kramer test. \* $p<0.05$  versus saline; # $p<0.05$  versus *db/m*; § $p<0.05$  versus pretreatment in the same group. GCGR, glucagon receptor; GIP, glucose-dependent insulinotropic polypeptide; ITT, insulin tolerance test; mAb, monoclonal antibody; mRNA, messenger RNA; Ngn3, neurogenin3; OGTT, oral glucose tolerance test; Pax6, paired box 6; Pdx1, pancreatic and duodenal homeobox-1; qRT-PCR, quantitative reverse transcription PCR.

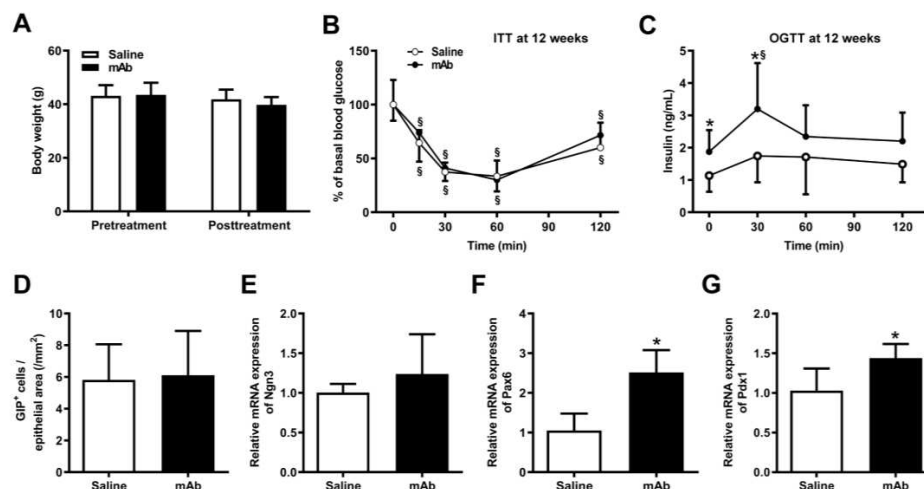

**Supplementary figure S2. Metabolic parameters and histocytological markers of high-fat diet + streptozotocin-induced type 2 diabetic male mice treated with the GCGR mAb or vehicle for 12 weeks.** The GCGR mAb (5 mg/kg) or saline was intraperitoneally administered once a week. (A-C) Metabolic parameters including body weight (A), blood glucose levels during ITT (B), and plasma insulin levels during OGTT (C) after the treatment.  $n=7-9$  mice per group. (D) Quantification of GIP-positive K-cells per epithelial area.  $n=3-5$  sections per mouse multiplied by 7-9 mice per group. (E-G) Relative mRNA levels of Ngn3 (E), Pax6 (F) and Pdx1 (G) in ileum tissues were detected by qRT-PCR.  $n=7-9$  mice per group. Data are expressed as the mean  $\pm$  SD. Statistical analysis was carried out using Student's t test or one-way analysis of variance followed by the post hoc Tukey-Kramer test when appropriate. \*  $p<0.05$  versus saline; §  $p<0.05$  versus pretreatment in the same group. GCGR, glucagon receptor; GIP, glucose-dependent insulinotropic polypeptide; ITT, insulin tolerance test; mAb, monoclonal antibody; mRNA, messenger RNA; Ngn3, neurogenin3; OGTT, oral glucose tolerance test; Pax6, paired box 6; Pdx1, pancreatic and duodenal homeobox-1; qRT-PCR, quantitative reverse transcription PCR.

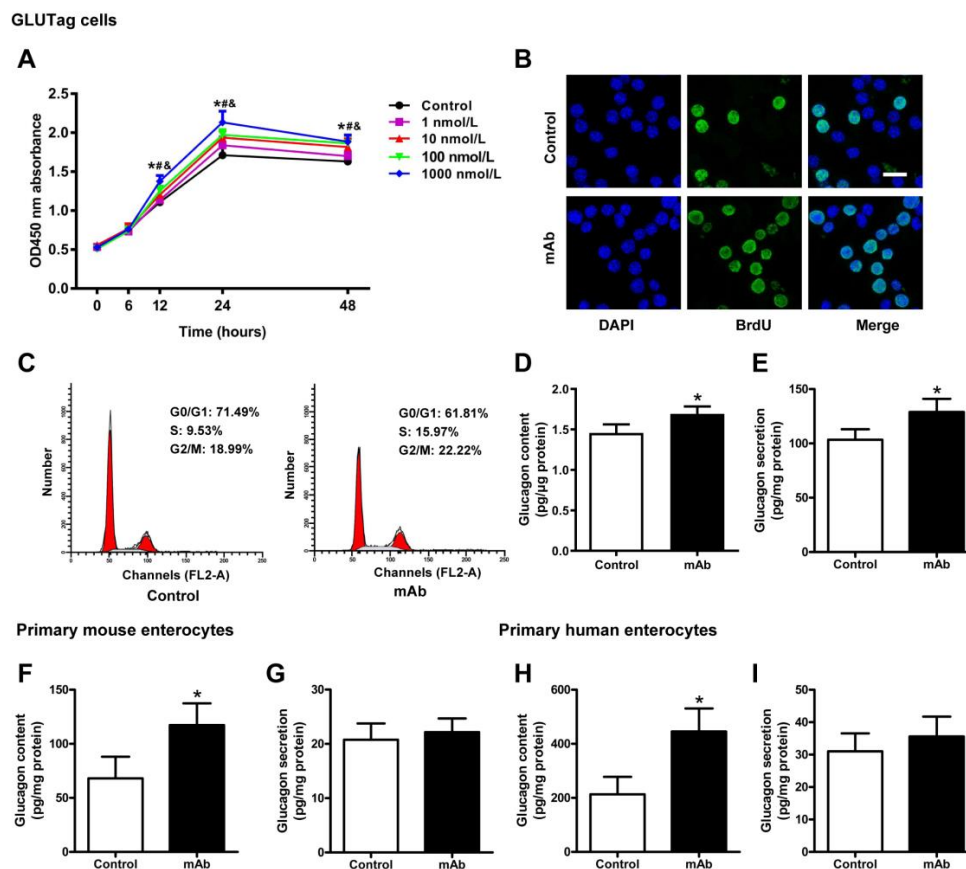

**Supplementary figure S3. Cell proliferation and glucagon production in cultured GLUTag cells, primary mouse and human intestinal cells.** (A) GLUTag cells were incubated with GCGR mAb (1, 10, 100 and 1000 nmol/L) for different time period (6, 12, 24 and 48 hours). Cell proliferation was measured using the cell counting kit-8 assay. (B) Representative fluorescence images showing BrdU positive cells by BrdU incorporation assay after a 24-hour GCGR mAb (1000 nmol/L) or vehicle treatment and subsequent 12-hour BrdU incorporation. Scale bar = 25  $\mu$ m. (C) Representative cell cycle distributions images determined by flow cytometry after treatment with GCGR mAb (1000 nmol/L) or vehicle for 24 hours. (D-I) GLUTag cells (D-E), primary mouse enterocytes (F-G) and primary human enterocytes (H-I) were cultured with GCGR mAb (1000 nmol/L) or vehicle for 24 hours. Intracellular (D, F, H) and supernatant (E, G, I) glucagon protein levels were measured by ELISA. Data were obtained from at least 3 independent experiments and are represented as mean  $\pm$  SD. Statistical analysis was conducted by one-way analysis of variance followed by the post hoc Tukey-Kramer test or Student's t test when appropriate. Data in A, \* $p$ <0.05 (1000 nmol/L versus Control); # $p$ <0.05 (100 nmol/L versus Control); & $p$ <0.05 (10 nmol/L versus Control). Data in D-I \* $p$ <0.05 versus Control. BrdU, 5-bromo-2'-deoxyuridine; DAPI, 4',6-diamidino-2-phenylindole; GCGR, glucagon receptor; mAb, monoclonal antibody.

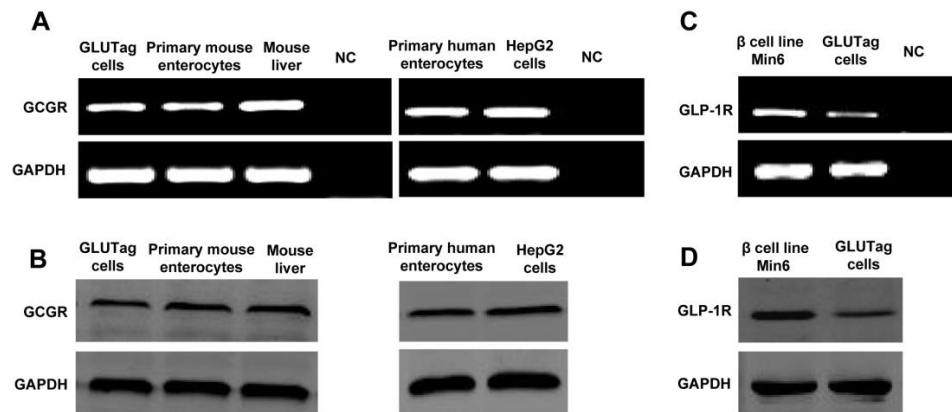

**Supplementary figure S4. Expression of the GCGR and GLP-1R in GLUTag cells, and cultured primary mouse and human enterocytes.** (A-D) The mRNA and protein expression of GCGR (A, B) and GLP-1R (C, D) was determined by RT-PCR and western blot, respectively. Mouse liver tissue or human hepatic cell line HepG2 served as a positive control for GCGR expression, and mouse pancreatic  $\beta$ -cell line Min6 was used as a positive control for GLP-1R expression. NC: no template control. GAPDH, glyceraldehyde-3-phosphate dehydrogenase; GCGR, glucagon receptor; GLP-1R, glucagon-like peptide-1 receptor; mRNA, messenger RNA; RT-PCR, reverse transcription PCR.

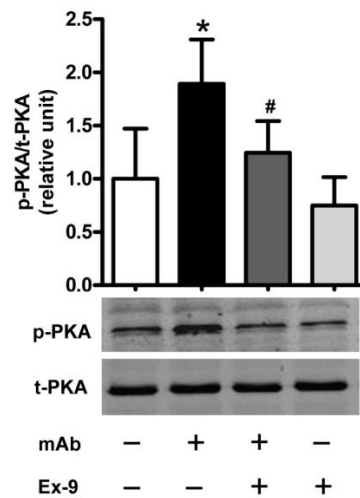

**Supplementary figure S5. The effects of GCGR mAb on PKA phosphorylation in GLUTag cells.** Cells were preincubated with the GLP-1R antagonist exendin (9–39) (Ex-9; 200 nmol/L) for 30 min and then coincubated with GCGR mAb for additional 23.5 hours. The protein levels of p-PKA and t-PKA were detected by western blot. Data are represented as mean  $\pm$  SD. Statistical analysis was conducted using one-way analysis of variance followed by the post hoc Tukey-Kramer test. \* $p < 0.05$  versus control; # $p < 0.05$  versus GCGR mAb. GCGR, glucagon receptor; GLP-1R, glucagon-like peptide-1 receptor; mAb, monoclonal antibody; PKA, protein kinase A; p-PKA, phosphorylated PKA; t-PKA, total PKA.

**Supplementary table S1. Key resource table**

| REAGENT or RESOURCE                                                                 | SOURCE                                           | IDENTIFIER                                 |
|-------------------------------------------------------------------------------------|--------------------------------------------------|--------------------------------------------|
| <b>Antibodies</b>                                                                   |                                                  |                                            |
| Mouse monoclonal anti-GLP-1 (1:1000)                                                | Abcam                                            | Catalog # ab23472;<br>RRID: AB_447455      |
| Rabbit polyclonal anti-GLP-1 (1:2000)                                               | Abcam                                            | Catalog # ab22625;<br>RRID: AB_447206      |
| Rabbit polyclonal anti-BrdU (1:150 for mouse tissues;<br>1:500 for GLUTag cells)    | Abcam                                            | Catalog # ab152095;<br>RRID: AB_2813902    |
| Rabbit monoclonal anti-GIP (1:1000)                                                 | Abcam                                            | Catalog # ab209792;<br>RRID: AB_2813903    |
| Mouse monoclonal anti-Ki-67 (1:1000)                                                | Santa Cruz Biotechnology                         | Catalog # sc-23900;<br>RRID: AB_627859     |
| Mouse monoclonal anti-PCNA (1:1000)                                                 | Cell Signaling Technology                        | Catalog # 2586;<br>RRID: AB_2160343        |
| Rabbit polyclonal anti-GCGR (1:1000)                                                | Sigma-Aldrich                                    | Catalog # SAB4501138;<br>RRID: AB_10746075 |
| Goat polyclonal anti-GLP-1 receptor (1:1000)                                        | OriGene Technologies, Inc.                       | Catalog # TA326758;<br>RRID: AB_2813904    |
| Rabbit polyclonal anti-PKA (1:1000)                                                 | Cell Signaling Technology                        | Catalog # 4782;<br>RRID: AB_2170170        |
| Rabbit polyclonal anti-phospho-PKA C (Thr197) (1:1000)                              | Cell Signaling Technology                        | Catalog # 4781;<br>RRID: AB_2300165        |
| IRDye 800CW-conjugated goat anti-rabbit IgG (1:10,000)                              | Rockland                                         | Catalog # 611-131-002<br>RRID: AB_1660973  |
| IRDye 800CW-conjugated goat anti-mouse IgG (1:10,000)                               | Rockland                                         | Catalog # 610-131-003<br>RRID: AB_220122   |
| Alexa Fluor 594-conjugated AffiniPure goat polyclonal anti-mouse IgG (H+L) (1:800)  | Jackson ImmunoResearch Labs                      | Catalog #115-585-003;<br>RRID: AB_2338871  |
| Alexa Fluor 488-conjugated AffiniPure goat polyclonal anti-rabbit IgG (H+L) (1:800) | Jackson ImmunoResearch Labs                      | Catalog #115-545-003;<br>RRID: AB_2338046  |
| <b>Chemicals, Peptides, and Recombinant Proteins</b>                                |                                                  |                                            |
| REMD 2.59 (a human GCGR mAb and competitive antagonist)                             | REMD Biotherapeutics                             | N/A                                        |
| High-fat diet (HFD)                                                                 | Beijing Keao Xieli Feed Co.,Ltd., Beijing, China | Catalog # D12451                           |
| Streptozocin (STZ)                                                                  | Sigma-Aldrich                                    | Catalog # S0130                            |
| Dipeptidyl peptidase-4 inhibitor                                                    | Millipore                                        | Catalog # DPP4                             |

|                                           |                                                                                        |                       |
|-------------------------------------------|----------------------------------------------------------------------------------------|-----------------------|
| Aprotinin                                 | Sigma-Aldrich                                                                          | Catalog # ROAPRO      |
| DAPI                                      | Sigma-Aldrich                                                                          | Catalog # D9542       |
| DMEM basic (1 g/L D-Glucose)              | Thermo Fisher Scientific                                                               | Catalog # C11885500BT |
| DMEM basic (4.5 g/L D-Glucose)            | Thermo Fisher Scientific                                                               | Catalog # C11995500BT |
| L-15 Medium (Leibovitz)                   | Sigma-Aldrich                                                                          | Catalog # L1518       |
| Fetal bovine serum                        | HyClone                                                                                | Catalog # SH30084.03  |
| Penicillin Streptomycin                   | Thermo Fisher Scientific                                                               | Catalog # 15140-122   |
| GlutaMax                                  | Thermo Fisher Scientific                                                               | Catalog # 35050-061   |
| Matrigel                                  | Corning                                                                                | Catalog # 354234      |
| Y-27632 dihydrochloride                   | APEXBIO                                                                                | Catalog # A3008       |
| Collagenase type XI                       | Sigma-Aldrich                                                                          | Catalog # C9407       |
| BrdU                                      | Sigma-Aldrich                                                                          | Catalog # B9285       |
| Propidium iodide                          | Beyotime                                                                               | Catalog # C1052-2     |
| RNase                                     | Beyotime                                                                               | Catalog # C1052-3     |
| Trizol reagent                            | Thermo Fisher Scientific                                                               | Catalog # 15596018    |
| SYBR qPCR Mix                             | TOYOBO                                                                                 | Catalog # QPS-201     |
| RIPA lysis buffer                         | Applygen Technologies Inc.                                                             | Catalog # C1053       |
| Protease inhibitor                        | Applygen Technologies Inc.                                                             | Catalog # P1265       |
| Phosphatase inhibitor                     | Applygen Technologies Inc.                                                             | Catalog # P1260       |
| <b>Critical Commercial Assays</b>         |                                                                                        |                       |
| Active GLP-1 ELISA kit                    | Millipore                                                                              | Catalog # EGLP-35K    |
| Total GLP-1 ELISA kit                     | Millipore                                                                              | Catalog # EZGLP1T-36K |
| GLP-2 ELISA kit                           | Biovendor                                                                              | Catalog # RSCYK142R   |
| Glucagon ELISA kit                        | R&D Systems                                                                            | Catalog # DGCG0       |
| Insulin ELISA kit                         | Millipore                                                                              | Catalog # EZRMI-13K   |
| CCK-8 kit                                 | Dojindo Laboratories                                                                   | Catalog # CK04        |
| RevertAid First Strand cDNA Synthesis kit | Thermo Fisher Scientific                                                               | Catalog # K1622       |
| <b>Experimental Models and Cells</b>      |                                                                                        |                       |
| Mouse: C57BL/6N                           | Vital River Animal Center, Beijing, China                                              | Catalog # 213         |
| Mouse: <i>db/db</i>                       | Nanjing Biomedical Research Institute of Nanjing University, China                     | Catalog # T001463     |
| Cell: Murine GLUTag cells                 | A gift from Prof. Daniel J Drucker (Mt. Sinai Hospital, University of Toronto, Canada) | N/A                   |

**Supplementary table S2. Primers used in PCR**

| Gene symbol | Gene name                                | Species      | Gene ID | Primer sequences (5'-3')                                   | Tm (°C) | Product size (bp) |
|-------------|------------------------------------------|--------------|---------|------------------------------------------------------------|---------|-------------------|
| Gcg         | proglucagon                              | Mus musculus | 14526   | F: GCTTATAATGCTGGTGCAAG<br>R: TTCATCTCATCAGGGTCCTC         | 60      | 114               |
| Gcgr        | glucagon receptor                        | Mus musculus | 14527   | F: ATTTCTGCCCTGGTACCT<br>R: CGGGCCCACACCTCTTG              | 60      | 73                |
| Glp-1r      | glucagon-like peptide-1 receptor         | Mus musculus | 14652   | F: AGCACTGTCCGTCTTCATCA<br>R: AGAAGGCCAGCAGTGTGTAT         | 60      | 203               |
| Ngn3        | neurogenin 3                             | Mus musculus | 11925   | F: GCATGCACAACCTCAACTC<br>R: TTTGTAAGTTTGGCGTCATC          | 60      | 79                |
| Pdx1        | pancreatic and duodenal homeobox 1       | Mus musculus | 18609   | F: GAAATCCACAAAGCTCACG<br>R: CGGGTTCCGCTGTGTAAG            | 62      | 65                |
| Pax6        | paired box 6                             | Mus musculus | 18508   | F: TAACGGAGAAGACTCGGATGAAGC<br>R: CGGGCAAACACATCTGGATAATGG | 62      | 144               |
| Ki67        | proliferation marker protein Ki-67       | Mus musculus | 17345   | F: GACAGCTTCCAAAGCTCACCC<br>R: TGTGTCCTTAGCTGCCTCCT        | 60      | 230               |
| Pena        | proliferating cell nuclear antigen       | Mus musculus | 18538   | F: CCACATTGGAGATGCTGTTG<br>R: CAGTGGAGTGGCTTTTGTGA         | 60      | 208               |
| Gapdh       | glyceraldehyde-3-phosphate dehydrogenase | Mus musculus | 14433   | F: TGCACCACCAACTGCTTAGC<br>R: GGCATGGACTGTGGTCATGAG        | 60      | 87                |
| GCG         | proglucagon                              | Homo sapiens | 2641    | F: AATAACATTGCCAAACGTCACG<br>R: TCTGGGAAATCTCGCCTTCCT      | 60      | 146               |
| GcGR        | glucagon receptor                        | Homo sapiens | 2642    | F: CATCCACGCGAATCTGTTTGC<br>R: CGTCGCCAATTTTCTGGCTG        | 60      | 101               |
| GAPDH       | glyceraldehyde-3-phosphate dehydrogenase | Homo sapiens | 2597    | F: CATGAGAAGTATGACAACAGCCT<br>R: AGTCCTTCCACGATACCAAAGT    | 60      | 113               |
